# Supplementary material
Source: Copernicus journal article supplement (doi:10.5194/egusphere-2026-3656)

*Biogeosciences*

**Supporting Information for**

**Asymmetric patterns of soil carbon mineralization during thaw slump recovery: Stable fast-pool size but rebounding decomposition rate**

Hanhan Li<sup>1,2,#,\*</sup>, Tingan Dai<sup>1,#</sup>, Danni Luo<sup>1</sup>, Huan Wang<sup>1</sup>, Min Xie<sup>1</sup>, Yu Zhang<sup>1,2</sup>, Xuegang Luo<sup>1,2</sup>

<sup>1</sup> *College of Life Science and Agri-forestry, Southwest University of Science and Technology, Mianyang 621010, China*

<sup>2</sup> *Engineering Research Center of Biomass Materials, Ministry of Education, College of Life Science and Agri-forestry, Southwest University of Science and Technology, Mianyang 621010, China*

**Contents of this file**

Table S1 to S15

Figure S1-S3

Notes S1

## Supplementary Information Introduction

This Supplementary Information provides additional methodological details, raw data summaries, and validation results supporting the findings of the main manuscript titled "*Asymmetric patterns of soil carbon mineralization during thaw slump recovery: Stable fast-pool size but rebounding decomposition rate*". It includes 15 tables (S1–S15), 3 figures (S1–S3), and one technical note (Note S1), organized as follows:

**Tables S1–S3** describe the measured soil properties, analytical methods, and Python libraries used for data processing and modeling, ensuring reproducibility of all statistical procedures.

**Tables S4–S9** present model selection criteria (AICc), goodness-of-fit metrics, and partial least squares structural equation modeling (PLS-SEM) results—including path coefficients, effect decompositions, permutation tests, and predictive relevance ( $Q^2$ )—to validate the causal relationships between restoration time, organic carbon chemistry, microbial biomass, and  $k_{\text{fast}}$ .

**Tables S10–S11** extend the PLS-SEM framework by incorporating soil organic carbon  $\delta^{13}\text{C}$  and pH as additional drivers, and report correlation matrices linking soil moisture, texture, and carbon mineralization parameters.

**Tables S12–S15** detail sensitivity analyses of the two-pool model's parameter upper bounds, two-way ANOVA results under varying constraints, and robustness checks excluding single-pool samples, confirming that core conclusions are not biased by modeling choices.

**Figures S1–S3** visualize key bivariate relationships: a correlation heatmap of soil carbon, chemistry, and microbial metrics (S1); the negative trend of  $\delta^{13}\text{C}$  with restoration time and its link to  $k_{\text{fast}}$  (S2); and the recovery of soil pH and its positive association with  $k_{\text{fast}}$  (S3).

**Note S1** provides a technical justification for the selected upper bounds of the two-pool model parameters ( $k_{\text{fast}} \leq 1.0 \text{ d}^{-1}$ ,  $k_{\text{slow}} \leq 0.5 \text{ d}^{-1}$ ), demonstrating their validity and robustness.

Together, these materials reinforce the main text's conclusions by addressing methodological transparency, statistical rigor, and the independence of key findings from analytical assumptions.

**Table S1. Summary of measured soil physicochemical properties, carbon chemical composition, microbial characteristics, and extracellular enzyme activities, including units and notes.**

| Variable Category                                 | Specific Variables                  | Unit / Notes                |
|---------------------------------------------------|-------------------------------------|-----------------------------|
| Soil Physicochemical Properties                   | Soil Organic Carbon (SOC) content   | g/kg                        |
|                                                   | Total Nitrogen (TN) content         | g/kg                        |
|                                                   | Carbon to Nitrogen ratio (C/N)      | Ratio                       |
|                                                   | Dissolved Organic Carbon (DOC)      | mg/kg                       |
|                                                   | Soil Water Content                  | %                           |
|                                                   | pH                                  | Unitless                    |
|                                                   | Clay content                        | %                           |
|                                                   | Silt content                        | %                           |
|                                                   | Sand content                        | %                           |
| Carbon Chemistry Structure ( <sup>13</sup> C NMR) | Alkyl C                             | %                           |
|                                                   | O-alkyl C                           | %                           |
|                                                   | Aromatic C                          | %                           |
|                                                   | Carboxyl C                          | %                           |
|                                                   | Alkyl C / O-alkyl C ratio           | Ratio                       |
| Microbial Community (PLFA)                        | Total PLFA                          | μg/g                        |
|                                                   | Fungal PLFA                         | μg/g                        |
|                                                   | Bacterial PLFA                      | μg/g                        |
|                                                   | Actinobacterial PLFA                | μg/g                        |
|                                                   | Fungal to Bacterial ratio (F/B)     | Ratio                       |
| Extracellular Enzyme Activities                   | β-1,4-Glucosidase (BG)              | nmol/g/h                    |
|                                                   | β-1,4-N-Acetylglucosaminidase (NAG) | nmol/g/h                    |
|                                                   | Leucine Aminopeptidase (LAP)        | nmol/g/h                    |
|                                                   | Acid Phosphatase (MUF-Phos)         | nmol/g/h                    |
| Cumulative CO <sub>2</sub> Release                | Cumulative CO <sub>2</sub> release  | mg CO <sub>2</sub> -C/g SOC |

**Table S2. List of Python libraries and modules used in this study with corresponding analytical purposes.**

| Library / Module            | Purpose                                                            |
|-----------------------------|--------------------------------------------------------------------|
| pandas                      | Data reading, processing, and merging                              |
| numpy                       | Numerical computation and array manipulation                       |
| matplotlib.pyplot           | Plotting and graphical styling                                     |
| seaborn                     | Statistical chart generation and beautification                    |
| scipy.optimize              | Nonlinear least-squares fitting (curve_fit)                        |
| scipy.stats                 | Statistical tests (Pearson correlation, normal distribution, etc.) |
| sklearn.decomposition       | Principal component analysis (PCA)                                 |
| sklearn.preprocessing       | Data standardization (StandardScaler)                              |
| sklearn.linear_model        | Linear regression (LinearRegression)                               |
| sklearn.cross_decomposition | Partial least squares regression (PLSRegression)                   |
| itertools                   | Generation of combinations (used in hierarchical partitioning)     |
| statsmodels.api             | Analysis of variance (ANOVA) and statistical modeling              |
| statsmodels.formula.api     | R-style formula interface (OLS)                                    |
| statsmodels.stats.multicomp | Post-hoc multiple comparison (Tukey HSD)                           |
| warnings                    | Suppression of warning messages                                    |

**Table S3. Comparison of model fit between the single-pool and two-pool models for each soil sample (AICc and R<sup>2</sup>).**

| SampleID | Years    | Depth   | AICc single | AICc double | Delta AICc | Selected model | R <sup>2</sup> |
|----------|----------|---------|-------------|-------------|------------|----------------|----------------|
| 1-C-A1   | Control  | Topsoil | 12.1        | -35.4       | 47.6       | double         | 0.998          |
| 1-C-A2   | Control  | Topsoil | 5.16        | -46.4       | 51.5       | double         | 0.997          |
| 1-C-A3   | Control  | Topsoil | -2.29       | -54.9       | 52.6       | double         | 0.997          |
| 1-HT1-A1 | 1 year   | Topsoil | -1.58       | -55.4       | 53.8       | double         | 0.998          |
| 1-HT1-A2 | 1 year   | Topsoil | 5.61        | -47.1       | 52.7       | double         | 0.998          |
| 1-HT1-A3 | 1 year   | Topsoil | 6.00        | -49.4       | 55.4       | double         | 0.995          |
| 1-HT2-A1 | 12 years | Topsoil | 1.73        | -54.4       | 56.1       | double         | 0.998          |
| 1-HT2-A2 | 12 years | Topsoil | 7.93        | -50.9       | 58.9       | double         | 0.998          |
| 1-HT2-A3 | 12 years | Topsoil | -4.99       | -65.7       | 60.7       | double         | 0.996          |
| 1-HT3-A1 | 23 years | Topsoil | -39.5       | -33.8       | -5.70      | single         | 0.955          |
| 1-HT3-A2 | 23 years | Topsoil | -20.4       | -70.0       | 49.6       | double         | 0.998          |
| 1-HT3-A3 | 23 years | Topsoil | -47.9       | -65.0       | 17.2       | double         | 0.994          |
| 1-C-B1   | Control  | Subsoil | -36.6       | -82.0       | 45.4       | double         | 0.999          |
| 1-C-B2   | Control  | Subsoil | -25.3       | -74.4       | 49.1       | double         | 0.999          |
| 1-C-B3   | Control  | Subsoil | -26.6       | -64.0       | 37.4       | double         | 0.997          |
| 1-HT1-B1 | 1 year   | Subsoil | -35.3       | -81.1       | 45.8       | double         | 0.999          |

|          |          |         |       |       |      |        |       |
|----------|----------|---------|-------|-------|------|--------|-------|
| 1-HT1-B2 | 1 year   | Subsoil | 2.50  | -43.7 | 46.2 | double | 0.997 |
| 1-HT1-B3 | 1 year   | Subsoil | -14.5 | -58.1 | 43.6 | double | 0.996 |
| 1-HT2-B1 | 12 years | Subsoil | -27.8 | -77.0 | 49.2 | double | 0.998 |
| 1-HT2-B3 | 12 years | Subsoil | -35.3 | -67.6 | 32.3 | double | 0.994 |
| 1-HT3-B1 | 23 years | Subsoil | -61.4 | -91.3 | 30.0 | double | 0.999 |
| 1-HT3-B2 | 23 years | Subsoil | -61.4 | -65.4 | 4.02 | double | 0.997 |
| 1-HT3-B3 | 23 years | Subsoil | -49.2 | -59.6 | 10.4 | double | 0.992 |

---

**Table S4. Effect sizes (Cohen's d) of  $k_{fast}$  comparing the stable stage (23 years) with other restoration stages.**

| Comparison           | Cohen's d |
|----------------------|-----------|
| 23 years vs 1 year   | 1.94      |
| 23 years vs 12 years | 1.45      |
| 23 years vs Control  | 1.67      |

**Table S5 Pearson correlation matrix and significance levels (*p*) among soil carbon pool parameters, chemical properties, and microbial traits.**

|                      | $C_{0,\text{total}}$ | $C_{0,\text{fast}}$ | $k_{\text{fast}}$ | $C_{0,\text{slow}}$ | $k_{\text{slow}}$ | SOC   | TN    | C/N   | DOC   | O-alkyl C | Alkyl C  | Alkyl C/O-alkyl C | PLFA  | F PLFA/B PLFA | BG       | NAG  |
|----------------------|----------------------|---------------------|-------------------|---------------------|-------------------|-------|-------|-------|-------|-----------|----------|-------------------|-------|---------------|----------|------|
| $C_{0,\text{total}}$ | 1.00                 |                     |                   |                     |                   |       |       |       |       |           |          |                   |       |               |          |      |
| $C_{0,\text{fast}}$  | 0.029                | 1.00                |                   |                     |                   |       |       |       |       |           |          |                   |       |               |          |      |
| $k_{\text{fast}}$    | 0.001                | 0.009               | 1.00              |                     |                   |       |       |       |       |           |          |                   |       |               |          |      |
| $C_{0,\text{slow}}$  | 0.000                | 0.029               | 0.001             | 1.00                |                   |       |       |       |       |           |          |                   |       |               |          |      |
| $k_{\text{slow}}$    | 0.002                | 0.014               | 0.005             | 0.002               | 1.00              |       |       |       |       |           |          |                   |       |               |          |      |
| SOC                  | 0.227                | 0.187               | 0.071             | 0.227               | 0.569             | 1.00  |       |       |       |           |          |                   |       |               |          |      |
| TN                   | 0.768                | 0.595               | 0.167             | 0.768               | 0.800             | 0.001 | 1.00  |       |       |           |          |                   |       |               |          |      |
| C/N                  | 0.106                | 0.173               | 0.535             | 0.106               | 0.569             | 0.403 | 0.290 | 1.00  |       |           |          |                   |       |               |          |      |
| DOC                  | 0.222                | 0.145               | 0.060             | 0.222               | 0.683             | 0.440 | 0.417 | 0.929 | 1.00  |           |          |                   |       |               |          |      |
| O-alkyl C            | 0.162                | 0.000               | 0.092             | 0.162               | 0.105             | 0.058 | 0.316 | 0.158 | 0.484 | 1.00      |          |                   |       |               |          |      |
| Alkyl C              | 0.235                | 0.024               | 0.045             | 0.235               | 0.011             | 0.850 | 0.443 | 0.290 | 0.477 | 0.141     | 1.00     |                   |       |               |          |      |
| Alkyl C/O-alkyl C    | 0.158                | 0.003               | 0.023             | 0.158               | 0.007             | 0.465 | 0.306 | 0.602 | 0.411 | 0.016     | 1.71E-08 | 1.00              |       |               |          |      |
| PLFA (Total)         | 0.249                | 0.003               | 0.209             | 0.249               | 0.354             | 0.298 | 0.603 | 0.389 | 0.086 | 0.118     | 0.312    | 0.206             | 1.00  |               |          |      |
| F PLFA/B PLFA        | 0.412                | 0.017               | 0.356             | 0.412               | 0.303             | 0.691 | 0.610 | 0.073 | 0.201 | 0.004     | 0.430    | 0.168             | 0.299 | 1.00          |          |      |
| BG                   | 0.138                | 0.348               | 0.466             | 0.138               | 0.776             | 0.534 | 0.926 | 0.182 | 0.766 | 0.913     | 0.620    | 0.655             | 0.230 | 0.646         | 1.00     |      |
| NAG                  | 0.095                | 0.181               | 0.375             | 0.095               | 0.518             | 0.592 | 0.878 | 0.200 | 0.593 | 0.793     | 0.419    | 0.458             | 0.081 | 0.827         | 9.40E-10 | 1.00 |

**Table S6. Bootstrap-based significance test results for path coefficients in the PLS-SEM.**

| From              | To                | CI lower | CI upper | <i>p</i> | Significance |
|-------------------|-------------------|----------|----------|----------|--------------|
| Recovery Time     | Organic Chemistry | 0.062    | 1.07     | 0.035    | *            |
| Recovery Time     | Microbial Biomass | -2.18    | -0.223   | 0.022    | *            |
| Organic Chemistry | Microbial Biomass | -1.90    | 0.360    | 0.132    | ns           |
| Recovery Time     | $k_{\text{fast}}$ | 0.142    | 1.12     | 0.005    | **           |
| Organic Chemistry | $k_{\text{fast}}$ | 0.241    | 1.10     | 0.008    | **           |
| Microbial Biomass | $k_{\text{fast}}$ | -0.456   | -0.033   | 0.141    | ns           |

**Table S7. Decomposition of the total, direct, and indirect effects of restoration age on  $k_{fast}$ .**

| Effect                           | Coefficient |
|----------------------------------|-------------|
| Direct                           | 0.697       |
| Indirect (via Organic Chemistry) | 0.328       |
| Indirect (via Microbial Biomass) | 0.217       |
| Indirect (serial)                | 0.093       |
| Total Indirect                   | 0.639       |
| Total Effect                     | 1.34        |

**Table S8. Permutation test results for path coefficients in the PLS-SEM.**

| From              | To                | Original coef | Permuted mean | Permuted std | Permutation p | Perm CI lower | Perm CI upper |
|-------------------|-------------------|---------------|---------------|--------------|---------------|---------------|---------------|
| Recovery Time     | Organic Chemistry | 0.541         | -0.002        | 0.277        | 0.047         | -0.545        | 0.523         |
| Recovery Time     | Microbial Biomass | -1.16         | -0.003        | 0.556        | 0.028         | -1.03         | 1.08          |
| Organic Chemistry | Microbial Biomass | -0.920        | 0.010         | 0.555        | 0.094         | -1.13         | 0.988         |
| Recovery Time     | $k_{fast}$        | 0.697         | 1.94E-04      | 0.278        | 0.005         | -0.516        | 0.540         |
| Organic Chemistry | $k_{fast}$        | 0.607         | -0.001        | 0.277        | 0.021         | -0.557        | 0.488         |
| Microbial Biomass | $k_{fast}$        | -0.188        | -0.001        | 0.138        | 0.167         | -0.219        | 0.292         |

**Table S9. Predictive relevance ( $Q^2$ ) assessment for the Partial Least Squares Structural Equation Model (PLS-SEM).**

| Latent Variable   | $Q^2$  | PRESS | SSO  |
|-------------------|--------|-------|------|
| Organic Chemistry | 0.173  | 32.9  | 39.8 |
| Microbial Biomass | 0.0125 | 81.4  | 82.5 |
| $k_{fast}$        | 0.349  | 13.2  | 20.2 |

**Table S10. Extended partial least squares structural equation model (PLS-SEM) path coefficients incorporating soil organic carbon  $\delta^{13}\text{C}$  and pH as additional latent variables**

| From              | To                | Coefficient | CI lower | CI upper | p     | Significance |
|-------------------|-------------------|-------------|----------|----------|-------|--------------|
| Recovery Time     | Organic Chemistry | 0.541       | 0.072    | 1.08     | 0.033 | *            |
| Recovery Time     | Carbon Isotope    | -0.761      | -1.11    | -0.393   | 0.000 | ***          |
| Recovery Time     | Acidity           | 0.152       | -0.390   | 0.658    | 0.556 | ns           |
| Recovery Time     | Microbial Biomass | -1.158      | -2.20    | -0.244   | 0.024 | *            |
| Organic Chemistry | Carbon Isotope    | -0.700      | -1.11    | -0.317   | 0.000 | ***          |
| Organic Chemistry | $k_{\text{fast}}$ | 0.607       | 0.248    | 1.12     | 0.008 | **           |
| Carbon Isotope    | $k_{\text{fast}}$ | -0.572      | -1.05    | -0.163   | 0.015 | *            |
| Acidity           | Microbial Biomass | -0.653      | -1.51    | 0.027    | 0.095 | ns           |
| Acidity           | $k_{\text{fast}}$ | 0.515       | 0.155    | 1.22     | 0.041 | *            |
| Microbial Biomass | $k_{\text{fast}}$ | -0.188      | -0.459   | -0.032   | 0.209 | ns           |
| Recovery Time     | $k_{\text{fast}}$ | 0.697       | 0.140    | 1.11     | 0.005 | **           |

**Table S11. Pearson correlation matrix among soil moisture, texture, and fast-pool decomposition rate constant ( $k_{fast}$ )**

|              | Moisture | Clay1  | Silt   | Clay2  | $k_{fast}$ | $C_{0,fast}$ | A/O    |
|--------------|----------|--------|--------|--------|------------|--------------|--------|
| Moisture     | 1.00     | 0.351  | 0.073  | -0.183 | -0.360     | 0.114        | -0.360 |
| Clay1        | 0.351    | 1.00   | 0.073  | -0.396 | -0.041     | -0.068       | 0.024  |
| Silt         | 0.073    | 0.073  | 1.00   | -0.945 | -0.305     | 0.037        | -0.243 |
| Clay2        | -0.183   | -0.396 | -0.945 | 1.00   | 0.294      | -0.012       | 0.212  |
| $k_{fast}$   | -0.360   | -0.041 | -0.305 | 0.294  | 1.00       | -0.671       | 0.624  |
| $C_{0,fast}$ | 0.114    | -0.068 | 0.037  | -0.012 | -0.671     | 1.00         | -0.758 |
| A/O          | -0.360   | 0.024  | -0.243 | 0.212  | 0.624      | -0.758       | 1.00   |

**Table S12. Fraction of samples reaching the upper bound of  $k_{\text{fast}}$  under different upper bound values (with  $k_{\text{slow}}$  bound fixed at 0.5 d<sup>-1</sup>).**

| $k_{\text{fast}}$ upper bound (d <sup>-1</sup> ) | Fraction at the bound |
|--------------------------------------------------|-----------------------|
| 0.5                                              | 0.217                 |
| 1.0                                              | 0.174                 |
| 2.0                                              | 0.130                 |
| 5.0                                              | 0.130                 |
| 1,000,000 (unconstrained)                        | 0.0000                |

**Table S13. Fraction of samples reaching the upper bound of  $k_{\text{slow}}$  under different upper bound values (with  $k_{\text{fast}}$  bound fixed at 1.0 d<sup>-1</sup>).**

| $k_{\text{slow}}$ upper bound (d <sup>-1</sup> ) | Fraction at the bound |
|--------------------------------------------------|-----------------------|
| 0.2                                              | 0.0                   |
| 0.5                                              | 0.0                   |
| 1.0                                              | 0.0                   |
| 2.0                                              | 0.0                   |

**Table S14. Two-way ANOVA results for  $k_{\text{fast}}$  under different upper bounds of  $k_{\text{fast}}$  (Years: recovery year; Depth: soil depth).**

| $k_{\text{fast}}$ upper bound (d <sup>-1</sup> ) | Years $p$ | Depth $p$ | Years $\times$ Depth $p$ | $N$ |
|--------------------------------------------------|-----------|-----------|--------------------------|-----|
| 0.5                                              | 0.028     | 0.045     | 0.833                    | 23  |
| 1.0                                              | 0.003     | 0.218     | 0.942                    | 23  |
| 2.0                                              | 0.003     | 0.413     | 0.993                    | 23  |
| 5.0                                              | 0.008     | 0.445     | 0.866                    | 23  |

**Table S15. Robustness check of core statistical results after excluding the sample fitted by the single-pool model.**

| Analysis item                                                         | All samples | Double-library samples | Consistent? |
|-----------------------------------------------------------------------|-------------|------------------------|-------------|
| ANOVA p-value (Years for $k_{\text{fast}}$ )                          | 0.0135      | 0.0135                 | Yes         |
| Pearson r ( $k_{\text{fast}}$ vs. Alkyl/O-alkyl)                      | 0.624       | 0.624                  | Yes         |
| p-value ( $k_{\text{fast}}$ vs. Alkyl/O-alkyl)                        | 0.0130      | 0.0130                 | Yes         |
| LMG: Total contribution of organic chemistry quality                  | 0.299       | 0.299                  | Yes         |
| PLS path coefficient: Recovery Time $\rightarrow k_{\text{fast}}$     | 0.697       | 0.697                  | Yes         |
| PLS path coefficient: Organic Chemistry $\rightarrow k_{\text{fast}}$ | 0.607       | 0.607                  | Yes         |

### **Notes S1. Sensitivity analysis of the upper bounds for the two-pool mineralization model parameters.**

To evaluate the influence of the parameter upper bounds in the two-pool model ( $k_{\text{fast}} \leq 1.0 \text{ d}^{-1}$ ,  $k_{\text{slow}} \leq 0.5 \text{ d}^{-1}$ ) on the fitting results and conclusions, we performed a sensitivity analysis of the upper bounds. We re-fitted the two-pool model for all samples under a series of upper-bound settings: for  $k_{\text{fast}}$ , the upper bound was set at 0.5, 1.0, 2.0, and 5.0  $\text{d}^{-1}$  with the  $k_{\text{slow}}$  bound fixed at 0.5  $\text{d}^{-1}$ ; for  $k_{\text{slow}}$ , the upper bound was set at 0.2, 0.5, 1.0, and 2.0  $\text{d}^{-1}$  with the  $k_{\text{fast}}$  bound fixed at 1.0  $\text{d}^{-1}$ . The results showed that the fraction of samples reaching the  $k_{\text{slow}}$  bound was 0% under all tested upper bounds, indicating that the bound of 0.5  $\text{d}^{-1}$  is sufficiently loose and does not impose any constraint on parameter estimation.

For  $k_{\text{fast}}$ , when the upper bound was 0.5  $\text{d}^{-1}$ , 21.7% of the samples reached the bound; this fraction decreased to 17.4% when the bound was relaxed to 1.0  $\text{d}^{-1}$ , and stabilized at approximately 13.0% at bounds of 2.0 and 5.0  $\text{d}^{-1}$  (Table. S2). This pattern suggests that the 1.0  $\text{d}^{-1}$  bound exerts only a mild constraint on a small number of samples. Furthermore, two-way ANOVA confirmed that the main effect of recovery year on  $k_{\text{fast}}$  remained significant (all  $p < 0.05$ ) across the different  $k_{\text{fast}}$  upper bounds (0.5–5.0  $\text{d}^{-1}$ ), whereas the effects of soil depth and their interaction were not significant (Table S4). The core statistical conclusion is thus completely unaffected by the choice of the upper bound. Therefore, the parameter upper bounds adopted in this study ( $k_{\text{fast}} \leq 1.0 \text{ d}^{-1}$ ,  $k_{\text{slow}} \leq 0.5 \text{ d}^{-1}$ ) can prevent non-physical solutions during numerical optimization without compromising the main scientific findings, and represent a reasonable and robust choice.

Figure S1. Correlation heatmap of soil carbon, chemistry, and microbial metrics

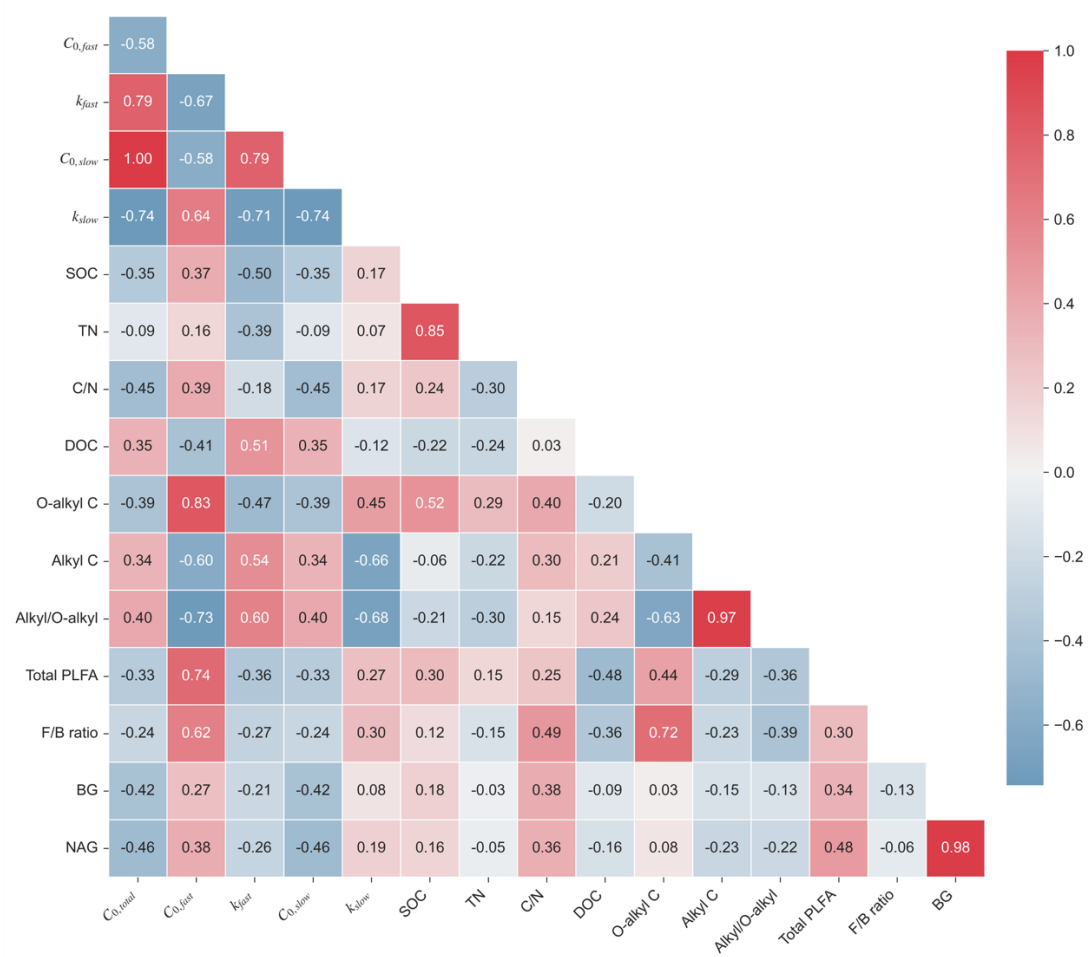

Figure S2. Relationships between soil organic carbon  $\delta^{13}\text{C}$  and the alkyl C/O-alkyl C ratio (A/O) and  $k_{\text{fast}}$

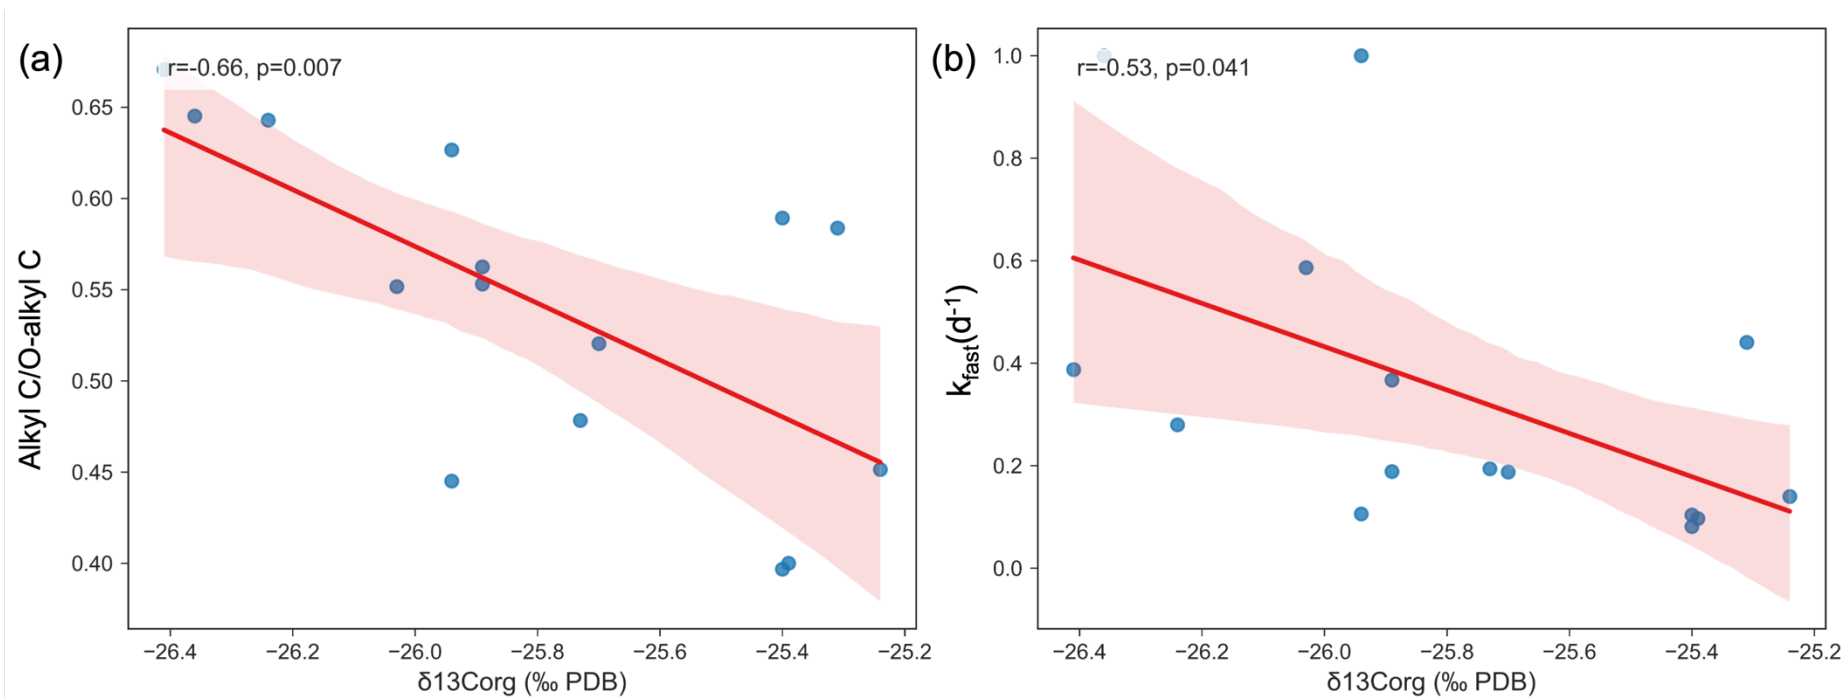

Figure S3. Relationship between soil pH and  $k_{fast}$

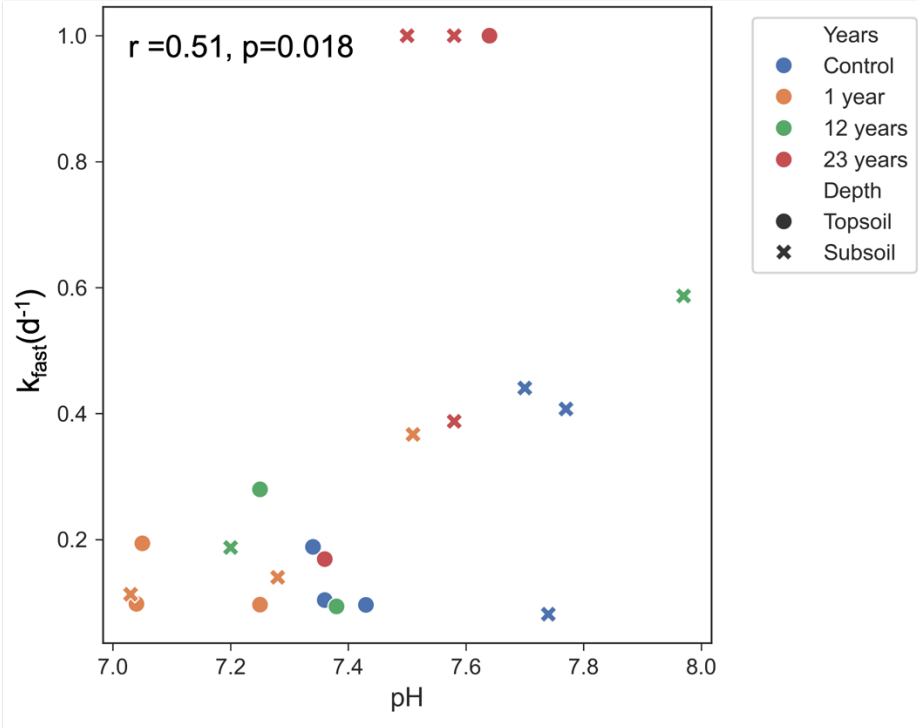

Supplement: Supplementary file 1 [file Supplementary Informatin (6.17).pdf › Supplement/Supplementary Informatin (6.17).pdf]
